# Supplementary material
Source: HighWire-hosted journal article supplement (http://www.qdcxjkg.com/highwire/filestream/113602/field_highwire_adjunct_files/0/ERJ-01200-2012_Disclosures.pdf)
Supplement: ERJ-01200-2012_Disclosures.pdf [file ERJ-01200-2012_Disclosures.pdf]

**R.J. Farney** has been a member of speaking panels and received compensation for attending training sessions and giving lectures on behalf of Cephalon and Sepracor Pharmaceutical companies. No potential conflicts of interest exist with any companies/organisations whose products or services may be discussed in this article.
